# Supplementary material
Source: publisher figshare collection journal article supplement (https://acs.figshare.com/ndownloader/files/5765544)
Supplement: Supplementary file 1 [file 5765544]

## Supplementary Material

Triplet States with Unusual Spin Polarization Resulting from  
Radical Ion Pair Recombination at Short DistancesGary P. Wiederrecht,<sup>a</sup> Walter A. Svec,<sup>a</sup> and Michael R. Wasielewski<sup>a,b\*</sup><sup>a</sup>Chemistry Division, Argonne National Laboratory,  
Argonne Illinois, 60439-4831, USA  
and<sup>b</sup>Department of Chemistry, Northwestern University,  
Evanston, Illinois 60208-3113, USA  
andTamar Galili,<sup>c</sup> and Haim Levanon,<sup>c\*</sup><sup>c</sup>Department of Physical Chemistry and The Farkas Center for Light-Induced Processes  
The Hebrew University of Jerusalem, Jerusalem 91904, Israel

Proton NMR spectra were obtained on a Bruker AM-300 300 MHz spectrometer. Mass spectra were obtained with a Kratos MALDI spectrometer. UV-visible spectra were obtained with a Shimadzu UV-160 spectrometer. Merck silica gel 60 was used for column chromatography. All solvents were reagent grade and distilled before use.

**D-A:**

*N*-amino-4-(1-piperidinyl)naphthalene-1,8-dicarboximide<sup>8</sup> (550 mg, 1.86 mmol) and *N*-(*n*-octyl)-naphthalene-1,8-dicarboxyanhydride-4,5-dicarboximide<sup>10</sup> (1.06 g, 2.79 mmol) were refluxed in DMF (20 ml) under N<sub>2</sub> for 18 hrs. The DMF was removed on a rotary evaporator and the residue was taken up CH<sub>2</sub>Cl<sub>2</sub> and chromatographed on silica gel using 4% acetone/ CH<sub>2</sub>Cl<sub>2</sub> as the eluent to yield 947 mg of **D-A**, 77%. Mass spec: 656.2 (calc. 656.8); <sup>1</sup>H NMR (δ in CDCl<sub>3</sub>): **D**: 8.61 (d, J=7.5 Hz, 1H, 7-naphthyl); 8.57 (d, J=8.1 Hz, 2-naphthyl); 8.49 (d, J = 8.4 Hz 1H, 5-naphthyl); 7.74 (d of d, 1H, J=7.5 Hz, J=8.4 Hz, 6-naphthyl); 7.24 (d, J=8.1 Hz, 1H, 3-naphthyl); 3.30 (m, 4H, piperidine); 1.92 (m, 4H, piperidine); 1.76 (m, 2H, piperidine); **A**: 8.83 (AB quartet, 4H, naphthalene ring), 4.22 (t, 4 H, N-methylene), 1.29 (broad singlet, 24 H, octyl chain), 0.89 (t, 6 H, 6.6 Hz, octyl chain methyl).
